# Supplementary material
Source: MDPI journal article supplement (https://www.mdpi.com/2311-7524/8/12/1121)
Supplement: s1 [file s1]

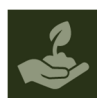

## Article

# Unveiling the Predisposing Factors for the Development of Branch Canker and Dieback in Avocado: A Case of Study in Chilean Orchards

Ana L. Valencia <sup>1</sup>, Jorge Saavedra-Torrico <sup>2</sup>, Inés Marlene Rosales <sup>1</sup>, Johanna Mártiz <sup>1</sup>, Alonso Retamales <sup>1</sup>, Andrés Link <sup>3</sup> and Pilar M. Gil <sup>1,\*</sup>

<sup>1</sup> Facultad de Agronomía e Ingeniería Forestal, Pontificia Universidad Católica de Chile, Casilla 306-22, Santiago 7810000, Chile

<sup>2</sup> Escuela de Ingeniería de Alimentos, Facultad de Ciencias Agronómicas y de los Alimentos, Pontificia Universidad Católica de Valparaíso, Av. Brasil 2950, Valparaíso 2340000, Chile

<sup>3</sup> Agricom—Westfalia Chile, El Golf 99, Piso 3 Las Condes, Santiago 7550000, Chile

\* Correspondence: pmgil@uc.cl

**Table S1.** Data analysis of information collected for 76 variables from 16 orchards in two growing seasons (2014 and 2015) included in this study.

| Variable <sup>a</sup>                 | Units <sup>b</sup> | Range         | Statistics <sup>c</sup> |
|---------------------------------------|--------------------|---------------|-------------------------|
| <b>Climate variables (spring, sp)</b> |                    |               |                         |
| ATsp                                  | °C                 | 15.96-18.59   | 16.99 ± 0.72            |
| MAXTsp                                | °C                 | 29.60-35.80   | 32.44 ± 1.67            |
| MINTsp                                | °C                 | 1.40-5.6      | 3.62 ± 1.04             |
| RADsp                                 | Wm <sup>-2</sup>   | 307.88-377.04 | 349.92 ± 19.72          |
| Rhsp                                  | %                  | 59.10-72.73   | 69.26 ± 4.64            |
| Ppsp                                  | mm                 | 0.00-127.10   | 64.85 ± 37.44           |
| <b>Climate variables (summer, su)</b> |                    |               |                         |
| ATsu                                  | °C                 | 16.06-21.36   | 19.58 ± 0.99            |
| MAXTsu                                | °C                 | 30.20-37.80   | 34.68 ± 2.08            |
| MINTsu                                | °C                 | 0.0-9.60      | 6.97 ± 1.77             |
| RADsu                                 | Wm <sup>-2</sup>   | 247.38-382.35 | 312.59 ± 40.67          |
| Rhsu                                  | %                  | 46.61-77.90   | 69.54 ± 6.40            |
| Ppsu                                  | mm                 | 0.00-12.20    | 1.47 ± 2.99             |
| <b>Climate variables (autumn, au)</b> |                    |               |                         |
| ATau                                  | °C                 | 10.13-18.98   | 15.83 ± 2.92            |
| MAXTau                                | °C                 | 28.50-37.70   | 32.60 ± 3.10            |
| MINTau                                | °C                 | -2.00-9.80    | 4.40 ± 3.99             |
| RADau                                 | Wm <sup>-2</sup>   | 95.03-226.14  | 166.12 ± 46.19          |

|                                       |                        |                                              |                    |
|---------------------------------------|------------------------|----------------------------------------------|--------------------|
| Rhau                                  | %                      | 67.18-88.25                                  | 77.78 ± 6.84       |
| Ppau                                  | mm                     | 0.00-269.6                                   | 112.72 ± 109.39    |
| <b>Climate variables (winter, wi)</b> |                        |                                              |                    |
| ATwi                                  | °C                     | 8.43-14.29                                   | 11.70 ± 2.15       |
| MAXTwi                                | °C                     | 20.60-30.70                                  | 25.34 ± 3.24       |
| MINTwi                                | °C                     | -0.70-6.00                                   | 2.97 ± 2.02        |
| RADwi                                 | Wm <sup>-2</sup>       | 52.35-236.58                                 | 151.52 ± 55.81     |
| Rhwi                                  | %                      | 39.37-91.59                                  | 81.03 ± 7.25       |
| Ppwi                                  | mm                     | 28.70-247.5                                  | 135.11 ± 66.76     |
| <b>Planting features</b>              |                        |                                              |                    |
| Lat                                   | DD                     | 31.59597-32.892146                           | 32.89 ± 0.65       |
| Long                                  | DD                     | 71.07928-71.212440                           | 71.09 ± 0.15       |
| Alt                                   | m                      | 71-741                                       | 339.00 ± 207.49    |
| Zone                                  | SDS                    | 1 = Inner valley with high coastal influence | 2                  |
|                                       |                        | 3 = Inner valley with low coastal influence  | 8                  |
|                                       |                        | 5 = Inner valley                             | 16                 |
|                                       |                        | 7 = Premountain valley                       | 6                  |
|                                       |                        |                                              |                    |
| Row                                   | grade                  | 71-741                                       | 92.31 ± 83.14      |
| Plants/ha                             | units ha <sup>-1</sup> | 178-1656                                     | 721.52 ± 451.54    |
| PlantAge                              | number                 | 2-26                                         | 12.62 ± 7.29       |
| Yield                                 | kg ha <sup>-1</sup>    | 1157-40972                                   | 12263.80 ± 8446.06 |
| VolumeC                               | m <sup>3</sup>         | 6.24-164.30                                  | 52.97 ± 45.90      |
| DiameterT                             | m                      | 0.3-75                                       | 19.34 ± 29.55      |
| Rstock                                | SDS                    | 1 = Zutano                                   | 6                  |
|                                       |                        | 3 = Nabal                                    | 4                  |
|                                       |                        | 5 = Mexicola                                 | 22                 |
| LAI                                   | -                      | 0.44-2.66                                    | 1.56 ± 0.62        |
| <i>Soil features</i>                  |                        |                                              |                    |
| Texture                               | SDS                    | 5 = Slit clay loam                           | 6                  |
|                                       |                        | 6 = Sandy clay loam                          | 8                  |
|                                       |                        | 7 = Loamy clay                               | 10                 |
|                                       |                        | 9 = Slit loam                                | 4                  |
|                                       |                        | 11 = Sandy loam                              | 4                  |
| Bd                                    | g cm <sup>-3</sup>     | 1.47-3.07                                    | 2.35 ± 0.51        |
| pHS                                   | -                      | 5.72-7.68                                    | 6.41 ± 0.68        |
| ECS                                   | mS cm <sup>-1</sup>    | 0.04-0.45                                    | 0.12 ± 0.09        |
| OMS                                   | %                      | 1.33-4.98                                    | 2.42 ± 0.92        |
| NS                                    | mg kg <sup>-1</sup>    | 3.0-129                                      | 26                 |
| PS                                    | mg kg <sup>-1</sup>    | 2.0-53.0                                     | 21                 |
| KS                                    | mg kg <sup>-1</sup>    | 66.0-411.0                                   | 194.37 ± 97.91     |

|                                  |                        |                       |                 |
|----------------------------------|------------------------|-----------------------|-----------------|
| CECS                             | meq/100 g              | 10.0-26.0             | 16.84 ± 4.68    |
| <i>Foliar nutrient content</i>   |                        |                       |                 |
| NF                               | %                      | 1.75-2.92             | 2.52 ± 0.31     |
| PF                               | %                      | 0.11-0.21             | 0.15 ± 0.02     |
| KF                               | %                      | 0.63-1.33             | 1.04 ± 0.18     |
| CaF                              | %                      | 1.48-2.39             | 1.92 ± 0.25     |
| MgF                              | %                      | 0.32-0.82             | 0.53 ± 0.13     |
| CuF                              | mg kg <sup>-1</sup>    | 3.0-16.0              | 8.38 ± 2.91     |
| MnF                              | mg kg <sup>-1</sup>    | 23.0-605.0            | 259.62 ± 182.36 |
| ZnF                              | mg kg <sup>-1</sup>    | 5.0-538               | 80.08 ± 129.00  |
| <b>Management variables.</b>     |                        |                       |                 |
| <i>Irrigation conditions</i>     |                        |                       |                 |
| ETcsp                            | mm                     | 80.55-401.60          | 191.54 ± 77.12  |
| ETcsu                            | mm                     | 85.66-481.90          | 221.82 ± 87.47  |
| ETcau                            | mm                     | 25.77-167.07          | 76.68 ± 32.12   |
| ETcwi                            | mm                     | 20.00-79.79           | 37.87 ± 14.32   |
| Issystem                         | SDS                    | 1 = microsprinkler    | 24              |
|                                  |                        | 3 = drip              | 8               |
| <i>Pruning management</i>        |                        |                       |                 |
| DateP                            | SDS                    | 1 = spring            | 12              |
|                                  |                        | 3 = summer            | 8               |
|                                  |                        | 5 = autumn            | 6               |
|                                  |                        | 7 = winter            | 2               |
|                                  |                        | 9 = spring and summer | 4               |
| FrP                              | SDS                    | 6 = semi annual       | 2               |
|                                  |                        | 12 = annual           | 22              |
|                                  |                        | 24 = biannnual        | 8               |
| IP                               | SDS                    | 1 = small branches    | 22              |
|                                  |                        | 3 = medium branches   | 6               |
|                                  |                        | 5 = main branches     | 4               |
| PasteP                           | BS                     | 0 = No                | 10              |
|                                  |                        | 1 = Yes               | 22              |
| <i>Agrochemical applications</i> |                        |                       |                 |
| FungicideP                       | BS                     | 0 = No                | 24              |
|                                  |                        | 1 = Yes               | 8               |
| UN/ha                            | units ha <sup>-1</sup> | 0.0-1411.00           | 404.92 ± 315.84 |
| Ca+                              | BS                     | 0 = No                | 24              |
|                                  |                        | 1 = Yes               | 8               |
| HumicA                           | BS                     |                       |                 |
|                                  |                        | 0 = No                | 16              |
|                                  |                        | 1 = Yes               | 16              |
| GR                               | L ha <sup>-1</sup>     | 0-15                  | 4.34 ± 4.11     |

|                                   |     |                                         |             |
|-----------------------------------|-----|-----------------------------------------|-------------|
| GRsite                            | SDS | 0 = without GR                          | 4           |
|                                   |     | 1 = foliage                             | 8           |
|                                   |     | 3= soil                                 | 4           |
|                                   |     | 5 = Foliage and soil                    | 16          |
| Grdate                            | SDS | 0 = without GR                          | 4           |
|                                   |     | 1 = spring                              | 16          |
|                                   |     | 3= summer                               | 6           |
|                                   |     | 5 = autumn                              | 6           |
|                                   |     | 7 = winter                              | 0           |
| <i>Stress abiotic and biotic</i>  |     |                                         |             |
| Frost                             | BS  | 0 = No                                  | 24          |
|                                   |     | 1 = Yes                                 | 8           |
| H <sub>2</sub> OET <sub>csu</sub> | %   | 38-285                                  | 1.35 ± 0.66 |
| Pests                             | SDS | 0 = without pests                       | 2           |
|                                   |     | 1 = black scales                        | 8           |
|                                   |     | 3= mites                                | 12          |
|                                   |     | 5 = white scales                        | 27          |
|                                   |     | 7 = thrips                              | 12          |
|                                   |     | 9 = snails                              | 2           |
| Diseases                          | SDS | 0 = healthy trees                       | 22          |
|                                   |     | 1 = <i>Verticillium</i> wilt            | 2           |
|                                   |     | 3 = <i>Phytophthora</i> canker          | 5           |
|                                   |     | 5 = Anthracnose                         | 3           |
| Distribution                      | SDS | 0 = healthy trees                       | 14          |
|                                   |     | 1 = uniform                             | 14          |
|                                   |     | 3 = random                              | 2           |
|                                   |     | 5 = aggregate                           | 2           |
| Icd                               | %   | 0.0-1.0                                 | 0.38 ± 0.39 |
| SCD                               | SDS | 0 = healthy trees                       | 14          |
|                                   |     | 1 = low dieback, without branch canker  | 4           |
|                                   |     | 3 = low dieback, low branch canker      | 4           |
|                                   |     | 5 = low dieback, moderate branch canker | 2           |
|                                   |     | 7 = high dieback, low branch canker     | 2           |
|                                   |     | 9 = low dieback, high branch canker     | 6           |
|                                   |     |                                         |             |

<sup>a</sup> AT = average air temperature; MAXT = maximum air temperature MINT = minimum air temperature; RAD = Average solar radiation; Rh = average relative air humidity; Pp = accumulated precipitation; Lat = Latitude; Long = longitude; Alt = altitude; Zone = agroclimatic zone; Row = row orientation; Plants/ha

---

= plantation density; PlantAge = age of each plant; yield = yield previous season; VolumeC = volume of the canopy; DiameterT = diameter of the trunk; Rstock = rootstock variety; LAI = leaf area index; Texture = USDA texture classes; Bd = bulk density; pHs = soil pH; ECS = soil electric conductivity; OMS = soil organic matter; NS = soil nitrogen; PS = soil phosphorus; KS = soil potassium, CECS = soil cationic exchange capacity; NF = foliar nitrogen; PF = foliar phosphorus; KF = foliar potassium; CaF = foliar calcium; MgF = foliar magnesium; CuF = foliar copper; MnF = foliar manganese; ZnF = foliar zinc; ETcsp, ETcsu, ETcau and Etcwi = crop evapotranspiration in each year season; Isystem = Irrigation system; DateP = date of pruning; FrP = frequency of pruning; IP = intensity of pruning; PasteP = pruning sealed of wounds; FungicideP = application of fungicide; UN/ha = Applied dosage of nitrogen; Ca+ = applied dosage of calcium; HumicA = application of humic acids; GR = annual doses of growth regulator applied; GRsite = site of growth regulator application; Grdate = date of growth regulator application; Frost = Risk of frost by orchard; H<sub>2</sub>OETcsu = water applied in summer; Pest = pest reported in each orchard; Diseases = diseases reported in each orchard; Distribution = Distribution of symptomatic trees; Icd = incidence of branch canker and dieback; SCD = severity of branch canker and dieback

<sup>b</sup> DD= decimal degrees, SDS=structured discrete scale, and BS=binary scale

<sup>c</sup> Statistics included averages  $\pm$  standard deviations and included absolute frequencies of variables with a structured discrete scale and binary scale for a better understanding of the analysis

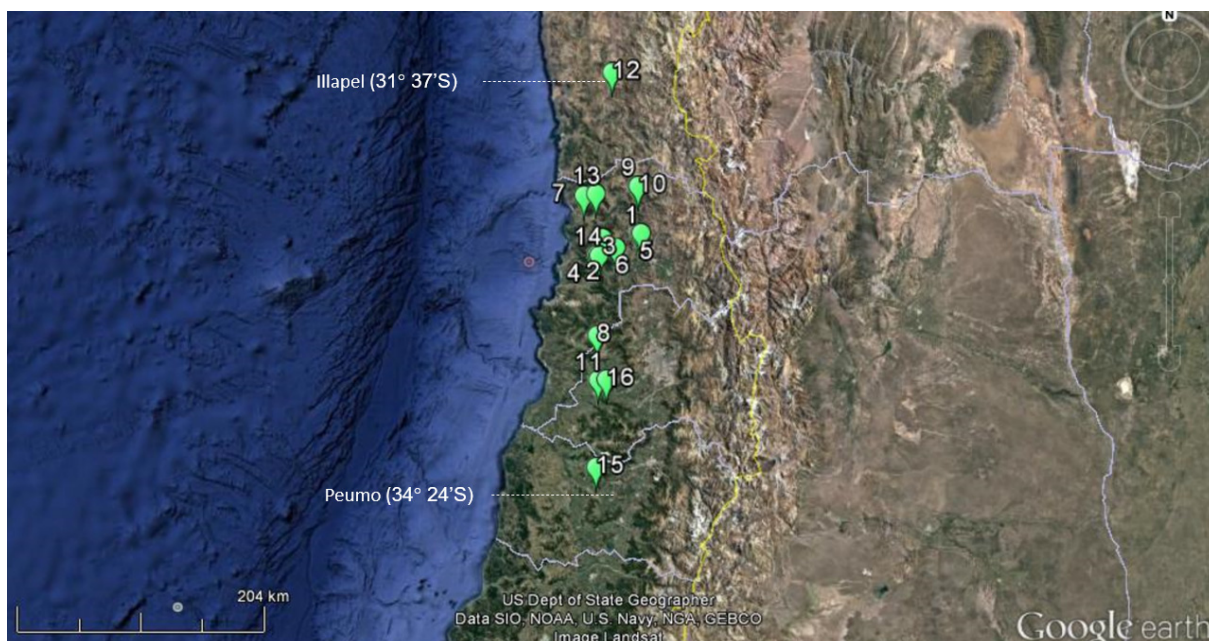

**Figure S1.** Map of sixteen 'Hass' avocado orchards in study. All sites corresponded to irrigated orchards of the main Chilean avocado production, located in an area of 428.97 kilometers between Illapel (31° 37'S) and Peumo (34° 24'S).

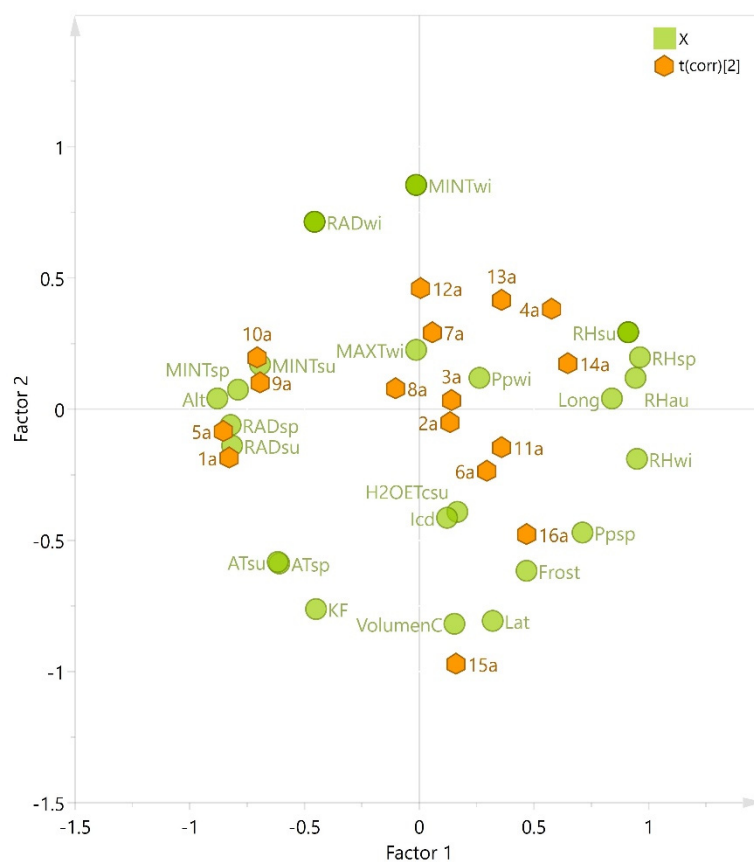

**Figure S2:** Biplot of the principal component analysis of predisposing factors associated with the incidence of branch canker and dieback in Chilean orchards prospected in the 2014 season; 16 observations (a).

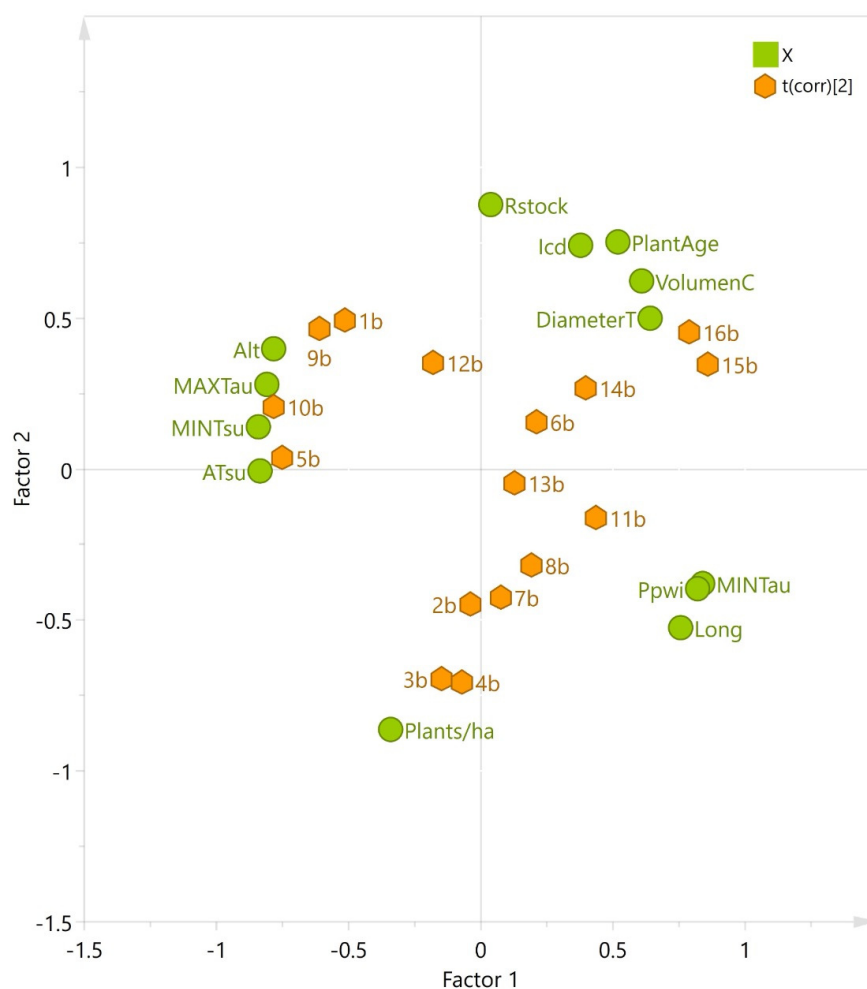

**Figure S3:** Biplot of the principal component analysis of predisposing factors associated with the incidence of branch canker and dieback in Chilean orchards prospected in the 2015 season; 16 observations (b).
